# 1    **Antiviral activity of plant juices and green tea against SARS-CoV-2 and influenza virus *in vitro***

2

3    Carina Conzelmann<sup>1</sup>, Tatjana Weil<sup>1</sup>, Rüdiger Groß<sup>1</sup>, Peggy Jungke<sup>2</sup>, Bruno Frank<sup>3</sup>, Maren Eggers<sup>4</sup>,

4    Janis A. Müller<sup>1\*</sup>, Jan Münch<sup>1\*</sup>

5

6    <sup>1</sup> Institute of Molecular Virology, Ulm University Medical Center, Ulm, Germany

7    <sup>2</sup> Technische Universität Dresden, Medical Faculty Carl Gustav Carus, Dresden, Germany

8    <sup>3</sup> CogniVerde GmbH Groß-Umstadt/Kleinrinderfeld, Germany

9    <sup>4</sup> Labor Prof. Dr. G. Enders MVZ GbR, Stuttgart, Germany

10

11    \*Corresponding authors:

12    Janis A. Müller and Jan Münch, Institute of Molecular Virology, Ulm University Medical Center

13    Meyerhofstrasse 1, 89081 Ulm, Germany, Phone: +49 731 500 65154, [Janis.mueller@uni-ulm.de](mailto:Janis.mueller@uni-ulm.de);

14    [jan.muench@uni-ulm.de](mailto:jan.muench@uni-ulm.de)

15

16    **Running title:** Green tea and juices against viruses

17

18    **Keywords:** COVID-19, vaccinia virus, adenovirus, transmission, oral rinses, green tea (*Camellia*

19    *sinensis*), black chokeberry (*Aronia melanocarpae*), pomegranate (*Punica granatum*), elderberry

20    (*Sambucus nigra*), phytomedicine

21

## 22    **Abstract**

23    Respiratory viruses initially infect the naso- and oropharyngeal regions, where they amplify, cause  
 24    symptoms and may also be transmitted to new hosts. Preventing initial infection or reducing viral  
 25    loads upon infection might soothe symptoms, prevent dissemination into the lower airways, or  
 26    transmission to the next individual. We here analyzed the potential of plant derived products to  
 27    inactivate SARS-CoV-2 and influenza virus. We found that black chokeberry (*Aronia melanocarpa*)  
 28    juice, pomegranate (*Punica granatum*) juice, and green tea (*Camellia sinensis*) have virucidal activity  
 29    against both viruses, suggesting that oral rinsing may reduce viral loads in the oral cavity thereby  
 30    lowering virus transmission.

31

## 32 Background

33 Respiratory viruses such as influenza viruses and coronaviruses pose a significant threat to global  
 34 health and are a substantial social, economic and healthcare burden, recently exemplified by the  
 35 coronavirus disease 2019 (COVID-19) pandemic caused by severe acute respiratory syndrome  
 36 coronavirus 2 (SARS-CoV-2) [1]. For SARS-CoV-2, the long incubation period of up to 14 days,  
 37 subclinical course and high transmissibility before onset of symptoms has led to unprecedented spread  
 38 around the globe [1,2]. Respiratory viruses initially infect the upper airways, both the naso- and  
 39 oropharyngeal areas, where they amplify, cause respiratory symptoms [3] and spread to new hosts.  
 40 Recent studies suggest gargling with commercial oral rinses may reduce virus spread and potentially  
 41 infection [4,5]. Several natural products also have direct antiviral activity or may ameliorate symptoms  
 42 of respiratory infections. Pomegranate (*Punica granatum*) [6] and black chokeberry (*Aronia*  
 43 *melanocarpa*) [7] extracts have been shown to be antivirally active against influenza viruses *in vitro*,  
 44 elderberry syrup (*Sambucus nigra*) showed improved symptom relief in influenza patients [8], and a  
 45 meta-analysis showed that gargling green tea (*Camellia sinensis*) lowered incidences of influenza  
 46 infections [9]. Natural products with a broad-spectrum antiviral activity would therefore be highly  
 47 useful to reduce spread of respiratory viruses in the population, as they are inexpensive and rapidly  
 48 deployable. Here, we evaluated the *in vitro* virucidal activity of green tea and herbal juices with  
 49 prospective use as oral rinses against the enveloped respiratory viruses, SARS-CoV-2 and influenza A  
 50 virus (IAV) and the naked adenovirus type 5 (AdV5). We found that influenza A virus is highly  
 51 susceptible to inactivation by all tested substances. SARS-CoV-2 was less affected, however,  
 52 inactivated by chokeberry juice and sensitive to green tea and pomegranate juice. AdV5 was resistant  
 53 to most products, but viral titers were reduced by chokeberry juice. These findings underline the  
 54 potential of common plant derived food products to contribute to the prevention of enveloped  
 55 respiratory virus infections and diseases, where chokeberry juice was the most potent natural product  
 56 tested herein.

57

58

59

## 60 **Methods**

### 61 *Herbal substances:*

62 Green tea (Bio-Grüntee Japan Sencha Tee-Gschwendner Nr. 700; pH 4.46) was prepared by infusing 3  
63 g of leaves with 0.1 g ascorbic acid (Sigma Aldrich) for 4 min in 300 ml freshly boiled water under  
64 gentle movement, followed by filtration. Black chokeberry juice (Bio-Aronia Direktsaft Fa. Aronia  
65 original L2719; pH: 3.69), pomegranate juice (Satower Granatapfelsaft Direktsaft klar; pH: 2.99), and  
66 elderberry juice (Satower Fliederbeersaft; pH: 4.13) with valid best before date were kept refrigerated  
67 until use.

### 68 *Cell culture*

69 Vero E6 (*Cercopithecus aethiops* derived epithelial kidney) cells were grown in Dulbecco's modified  
70 Eagle's medium (DMEM, Gibco) which was supplemented with 2.5% heat-inactivated fetal calf  
71 serum (FCS), 100 units/ml penicillin, 100 µg/ml streptomycin, 2 mM L- glutamine, 1 mM sodium  
72 pyruvate, and 1x non-essential amino acids. Madin Darby canine kidney cells (MDCK) and A549  
73 (adenocarcinomic human alveolar basal epithelial) cells were grown in minimal essential medium with  
74 Earle's salts (EMEM; Biochrom AG, Berlin, Germany) supplemented with 1% non-essential  
75 aminoacids (Biochrom AG, Berlin, Germany), 10% FCS. BHK-21 (*Mesocricetus auratus* kidney)  
76 cells were grown in DMEM (CCPro) with 10% FCS. For experiments, cells were seeded in medium  
77 containing 2% FCS. Cells were incubated at 37°C in a 5% CO<sub>2</sub> humidified incubator.

### 78 *Virus test strains and cultivation*

79 Virus was propagated by inoculation of respective target cells and culturing until strong cytopathic  
80 effect was visible. The supernatant was then harvested, centrifuged to deplete cellular debris, aliquoted  
81 and stored at -80°C as virus stocks. Modified vaccinia virus Ankara (provided from the Institute of  
82 Animal Hygiene and Veterinary Public Health of the University Leipzig) was passaged on BHK-21  
83 cells (provided by Friedrich Löffler institute), influenza A virus A/H1N1/Brisbane/59/2007 (Novartis

Vaccines and Diagnostics GmbH & Co. KG) on MDCK cells (ATCC), adenovirus type 5, strain adenoid 75 (kindly provided by Prof. Sauerbrei, University of Jena, Jena, Germany) on A549 cells (ATCC) and SARS-CoV-2 BetaCoV/France/IDF0372/2020 (obtained through European Virus Archive global) on Vero E6 cells (ATCC).

# *Infection assays*

To determine the virucidal activity of the herbal substances, they were mixed with the respective virus, incubated for a specified contact time at room temperature, and the remaining infectivity determined by tissue culture infectious dose 50 (TCID<sub>50</sub>) endpoint titration. This quantitative suspension test as described in EN 14476 [10] was performed for Modified vaccinia virus Ankara (MVA), influenza A virus (IAV) and adenovirus type 5 (AdV5) by incubating the respective virus with chokeberry, elderberry, or pomegranate juice, green tea, or buffer as control. Briefly, the efficacy of the tested products was examined as an 80% solution in the presence of 10% interfering substance (5% (w/v) BSA Fraction V (Sigma Aldrich), 0.4% (w/v) Mucin bovine Glandula submandibularis Type I-S (Sigma Aldrich), 5% (w/v) yeast extract (Sigma Aldrich)). SARS-CoV-2 was analyzed in 90% product. After the specified contact time, the test mixture was serially diluted 10-fold and titrated onto a 96 microtiter plate containing a confluent monolayer of the respective target cells in sextuplicates and the cells cultured until strong CPE was visible. IAV infected cells were additionally immunostained. Cells were then examined with a light microscope, the infected wells counted, and TCID<sub>50</sub> calculated according to Spearman-Kärber. If the cytotoxicity of the compound succeeded the lower limit of quantification (LLOQ), the titer was adjusted accordingly. The virucidal activity was determined by the difference of the logarithmic titer of the virus control minus the logarithmic titer of the virus incubated with the substance to test.

110

## 111 **Results**

112 To assess the virucidal potential of four plant-derived products, we performed a quantitative  
 113 suspension test using MVA (EN 14476 [10]) which is a resilient surrogate virus that is used for the  
 114 validation of virucidal disinfectants against all enveloped viruses according to the European Guidance  
 115 on the Biocidal Products Regulation [11]. While no reduction in viral titer was observed upon  
 116 incubation with control buffer, 5-minute incubation with chokeberry juice, elderberry juice,  
 117 pomegranate juice, or green tea yielded a 3.17, 0.67, 1.0 or 1.0 log<sub>10</sub> decrease in infectivity,  
 118 respectively (Figure 1, Table 1), indicating that the tested products are generally active against  
 119 enveloped viruses. An incubation time of 20 minutes was only marginally more potent, suggesting a  
 120 rapid acting antiviral effect. We then analyzed the two respiratory enveloped viruses responsible for  
 121 the “swine flu” in 2009/2010 and the ongoing COVID-19 pandemic, IAV and SARS-CoV-2,  
 122 respectively, as well as AdV5 as a naked control virus. A 5-minute incubation with chokeberry juice  
 123 yielded most potent antiviral activities and inactivated IAV, SARS-CoV-2 and also AdV5 to 99.99%,  
 124 96.98%, and 93.23%, respectively (Figure 1, Table 1). IAV was most susceptible to all products and  
 125 infectivity reduced >99% by elderberry juice, pomegranate juice and green tea. SARS-CoV-2 titers  
 126 were reduced approximately 80% by pomegranate juice and green tea already after 1-minute  
 127 incubation, however, unaffected by elderberry juice, corresponding to the results obtained with the  
 128 more resistant surrogate MVA. The naked AdV5 was resistant to three out of four products, however,  
 129 susceptible to chokeberry juice (Figure 1, Table 1). In summary, IAV is highly susceptible to all  
 130 analyzed products, whereas SARS-CoV-2 can be efficiently inactivated by chokeberry juice and is to a  
 131 lower level affected by pomegranate juice or green tea.

132

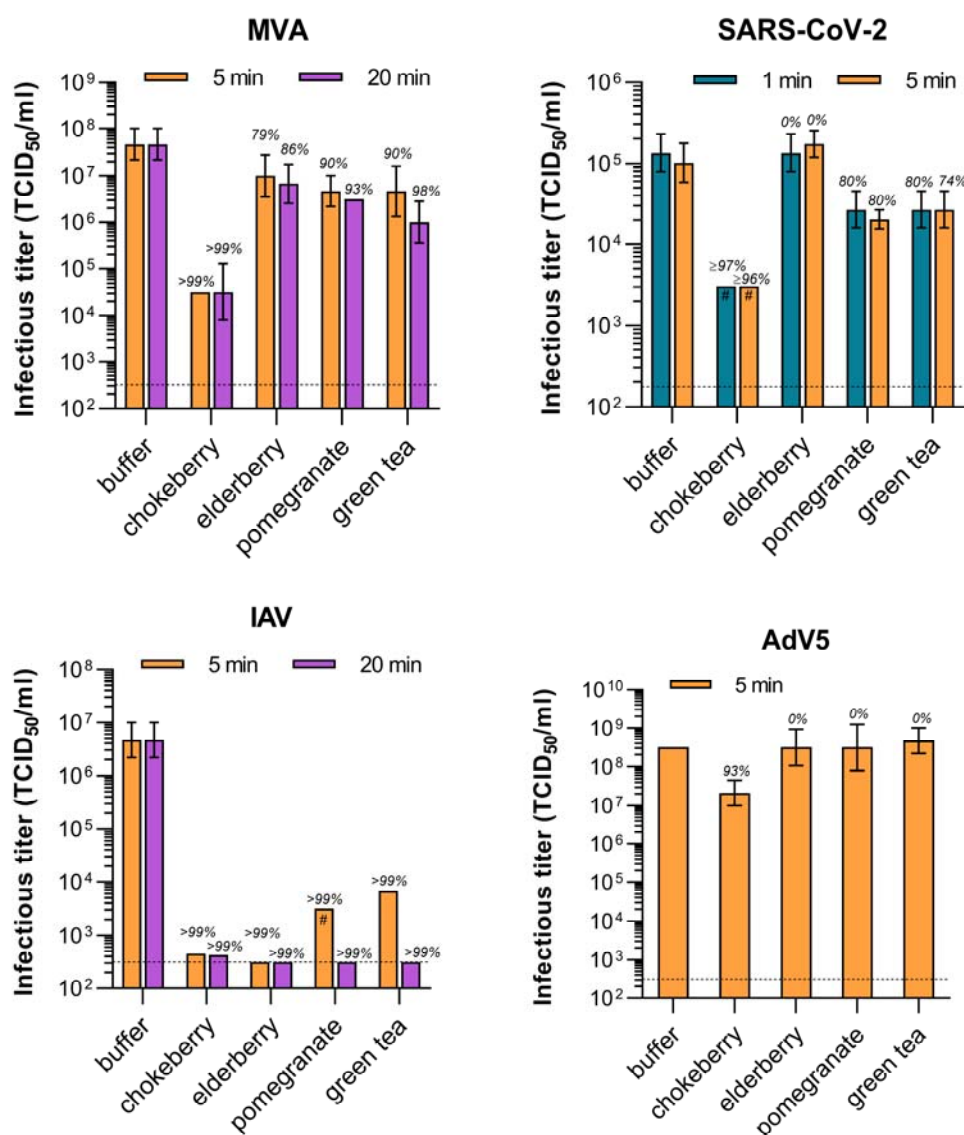

**Figure 1: Virucidal activity of natural products against MVA, IAV, SARS-CoV-2 and AdV5.**

MVA, IAV (A/H1N1/Brisbane/59/2007), SARS-CoV-2 (BetaCoV/France/IDF0372/2020), or AdV5 (adenoid 75) were incubated with the plant derived products for indicated contact times before serial titration and inoculation of target cells. Viral titers were determined by monitoring cytopathic effect and calculated as tissue culture infectious dose 50 (TCID<sub>50</sub>) according to Spearman-Kaerber. The lower limit of quantification (LLOQ) is defined by limit of titration (dotted line) or cytotoxicity of the compound (#). Error bars indicate standard deviation and italics above corresponding bars the decrease of titers compared to control.

**Table 1: Antiviral activity of natural products against MVA, IAV, SARS-CoV-2 and AdV5.**

Log<sub>10</sub> reduction factor and antiviral activity of chokeberry, elderberry, pomegranate juice and green tea against MVA, IAV, SARS-CoV-2 and AdV5 after indicated contact times. MVA, Modified vaccinia virus Ankara; IAV, influenza A virus (A/H1N1/Brisbane/59/2007); SARS-CoV-2, severe acute respiratory syndrome coronavirus 2 (BetaCoV/France/IDF0372/2020); AdV5 adenovirus type 5 (adenoid 75).

| virus | contact time (min) |                                    | control     | chokeberry  | elderberry  | pomegranate | green tea   |
|-------|--------------------|------------------------------------|-------------|-------------|-------------|-------------|-------------|
| MVA   | 5                  | titer                              | 7.67 ± 0.33 | 4.50 ± 0.00 | 7.00 ± 0.45 | 6.67 ± 0.33 | 6.67 ± 0.54 |
|       |                    | log <sub>10</sub> reduction factor |             | 3.17        | 0.67        | 1.00        | 1.00        |
|       |                    | infectivity reduction (%)          |             | 99.93       | 78.62       | 90.00       | 90.00       |
|       | 20                 | titer                              | 7.67 ± 0.33 | 4.50 ± 0.60 | 6.83 ± 0.42 | 6.50 ± 0.00 | 6.00 ± 0.45 |
|       |                    | log <sub>10</sub> reduction factor |             | 3.17        | 0.84        | 1.17        | 1.67        |
|       |                    | infectivity reduction (%)          |             | 99.93       | 85.55       | 93.24       | 97.86       |
| IAV   | 5                  | titer                              | 6.67 ± 0.33 | 2.66 ± 0.0  | ≤ 2.5 ± 0.0 | ≤ 3.5 ± 0.0 | 3.83 ± 0.0  |
|       |                    | log <sub>10</sub> reduction factor |             | 4.01        | ≥ 4.17      | ≥ 3.17      | 2.84        |
|       |                    | infectivity reduction (%)          |             | 99.99       | ≥ 99.99     | ≥ 99.93     | 99.86       |
|       | 20                 | titer                              | 6.67 ± 0.33 | 2.63 ± 0.0  | ≤ 2.5 ± 0.0 | ≤ 2.5 ± 0.0 | ≤ 2.5 ± 0.0 |
|       |                    | log <sub>10</sub> reduction factor |             | 4.04        | ≥ 4.17      | ≥ 4.17      | ≥ 4.17      |
|       |                    | infectivity reduction (%)          |             | 99.99       | ≥ 99.99     | ≥ 99.99     | ≥ 99.99     |

|                   |          |                                    |                 |                      |                 |                 |                 |
|-------------------|----------|------------------------------------|-----------------|----------------------|-----------------|-----------------|-----------------|
| <b>SARS-CoV-2</b> | <b>1</b> | titer                              | $5.13 \pm 0.23$ | $\leq 3.49 \pm 0.00$ | $5.13 \pm 0.23$ | $4.43 \pm 0.23$ | $4.43 \pm 0.23$ |
|                   |          | log <sub>10</sub> reduction factor |                 | $\geq 1.64$          | 0               | 0.70            | 0.70            |
|                   |          | infectivity reduction (%)          |                 | $\geq 97.71$         | 0               | 80.05           | 80.05           |
|                   | <b>5</b> | titer                              | $5.01 \pm 0.24$ | $\leq 3.49 \pm 0$    | $5.24 \pm 0.16$ | $4.31 \pm 0.12$ | $4.43 \pm 0.23$ |
|                   |          | log <sub>10</sub> reduction factor |                 | $\geq 1.52$          | 0               | 0.70            | 0.58            |
|                   |          | infectivity reduction (%)          |                 | $\geq 96.98$         | 0               | 80.05           | 73.70           |
| <b>AdV5</b>       | <b>5</b> | titer                              | $8.50 \pm 0.00$ | $7.33 \pm 0.33$      | $8.50 \pm 0.47$ | $8.50 \pm 0.60$ | $8.67 \pm 0.33$ |
|                   |          | log <sub>10</sub> reduction factor |                 | 1.17                 | 0               | 0               | 0               |
|                   |          | infectivity reduction (%)          |                 | 93.24                | 0               | 0               | 0               |

148

149

# Discussion

We examined and compared the virucidal activities of four natural beverages on a surrogate and three respiratory viruses and found that chokeberry juice, green tea and pomegranate juice reduced infectious titers of enveloped viruses with chokeberry juice being most efficient. The tested food products showed the highest antiviral efficacy against IAV, with  $\geq 4 \log_{10}$ , which corresponds to the effectiveness of typical disinfectants. The high susceptibility of IAV (H1N1), which is also a representative of influenza B and other influenza strains with regard to chemical stability, indicates low resilience of this virus family. SARS-CoV-2 behaved similar to the European model virus for enveloped viruses, MVA, and proved to be more resilient. Nevertheless, chokeberry juice inactivated >96% infectivity and pomegranate juice and green tea reduced titers, however, to a lesser extent. Notably, activity against MVA is prerequisite for validation of general disinfectant property of chemicals according to the European Chemicals Agency [11] and suggestive of broad activity against all enveloped viruses. As expected, the non-enveloped adenovirus, was less susceptible to the tested products, however, was also affected by the very potent chokeberry juice. Generally, differences in contact times did not have a strong influence on the efficiency of inactivation suggesting a rapid acting antiviral effect.

The antiviral activities of the plant products can be based on an acidic pH that may directly inactivate virus particles or by (poly-)phenols such as catechins, tannins or flavonoids that can act on viral and cellular proteins [12,13]. For example, pomegranate polyphenols were shown to inhibit influenza viruses by acting on virion surface glycoproteins and causing structural damage to the virion [14]. Similarly, green tea catechins have been shown to destroy the virion structure and *epigallocatechin gallate* aggregates virus particles to prevent their interaction with target cells [15]. Catechins not only act on the virus particles but have additionally been shown to prevent fusion by interfering with endosome acidification and viral enzymes. For theaflavin-3,3'-digallate computer modelling suggested that it might prevent SARS-CoV-2 infection by interacting with its cellular receptor angiotensin converting enzyme 2 (ACE2) [13,15]. Of note, the composition of natural food products may vary between batches, which might affect their antiviral efficiency. Nevertheless, the composition of

various antivirally active components, acting by different mechanisms, represents a potent mix interfering with virus infection.

Since viral replication, symptoms and transmission occur in the naso- and oropharyngeal area, reducing viral titers as early as possible might represent a proactive strategy to prevent infection, dissemination, disease, and spread. The herbal products are common and available food preparations that could be applied as convenient “oral rinses”. Antiseptic oral rinses containing membrane-damaging agents (i.e. ethanol, chlorhexidine, cetylpyridinium chloride, hydrogen peroxide and povidone-iodine) are used in various private or clinical situations for prophylactic and therapeutic purposes and have further been applied in the context of viral infections [4,5]. In contrast to these chemical preparations, green tea and herbal juices can be applied more frequently and may be simply swallowed. Gargling tea, tea extracts or plant juice followed by drinking has already been shown to lower the incidence of influenza virus infections, viral loads and symptoms [8,9]. Similarly, antivirally active plant products such as chokeberry [7] or pomegranate [6] juice might be translated into “clinical” use against influenza viruses and SARS-CoV-2.

In the case of SARS-CoV-2, the virus may be passed before symptom onset, which is particularly treacherous. Oral rinsing and gargling with the tested juices and tea are largely unproblematic in long-term use and might be a suitable pre- and postexposure prophylaxis against SARS-CoV-2 during the current COVID-19 pandemic for any individual but especially those with high risk of infection or severe disease including healthcare workers, elderly, or immunocompromised. Additionally, the possibility of swallowing the “oral rinse” is practical in many situations such as during a flight, train or car ride, in day-care centres or schools and can even be part of a healthy diet. Furthermore, it would be helpful to reduce the risk of transmission in school classes and children by using nutritionally valuable and healthy food products instead of aggressive disinfectants or obstructive measures.

Thus, the administration of chokeberry juice, pomegranate juice or green tea may offer a possibility to minimize the spread of enveloped respiratory viruses, ease symptoms and potentially contribute to disease prevention and clinical investigation of their benefits is warranted.

# References:

1. Bar-On YM, Flamholz A, Phillips R, Milo R. SARS-CoV-2 (COVID-19) by the numbers. *Elife* [Internet]. **2020**; 9(10):697–698. Available from: <https://elifesciences.org/articles/57309>
2. Gandhi M, Yokoe DS, Havlir D V. Asymptomatic transmission, the achilles’ heel of current strategies to control Covid-19. *N Engl J Med*. **2020**; 382(22):2158–2160.
3. Hou YJ, Okuda K, Edwards CE, et al. SARS-CoV-2 Reverse Genetics Reveals a Variable Infection Gradient in the Respiratory Tract. *Cell*. **2020**; 182(2):429-446.e14.
4. O’Donnell VB, Thomas D, Stanton R, et al. Potential Role of Oral Rinses Targeting the Viral Lipid Envelope in SARS-CoV-2 Infection. *Function*. **2020**; 1(1):1–12.
5. Meister TL, Brüggemann Y, Todt D, et al. Virucidal Efficacy of Different Oral Rinses Against Severe Acute Respiratory Syndrome Coronavirus 2. *J Infect Dis* [Internet]. **2020**; 222(8):1289–1292. Available from: [https://academic.oup.com/jid/advance-](https://academic.oup.com/jid/advance-article/doi/10.1093/infdis/jiaa471/5878067)  
[article/doi/10.1093/infdis/jiaa471/5878067](https://academic.oup.com/jid/advance-article/doi/10.1093/infdis/jiaa471/5878067)
6. Haidari M, Ali M, Ward Casscells S, Madjid M. Pomegranate (*Punica granatum*) purified polyphenol extract inhibits influenza virus and has a synergistic effect with oseltamivir. *Phytomedicine* [Internet]. Elsevier; **2009**; 16(12):1127–1136. Available from: <http://dx.doi.org/10.1016/j.phymed.2009.06.002>
7. Park S, Kim J Il, Lee I, et al. Aronia melanocarpa and its components demonstrate antiviral activity against influenza viruses. *Biochem Biophys Res Commun* [Internet]. Elsevier Inc.; **2013**; 440(1):14–19. Available from: <http://dx.doi.org/10.1016/j.bbrc.2013.08.090>
8. Zakay-Rones Z, Thom E, Wollan T, Wadstein J. Randomized study of the efficacy and safety of oral elderberry extract in the treatment of influenza A and B virus infections. *J Int Med Res*. **2004**; 32(2):132–140.
9. Ide K, Yamada H, Kawasaki Y. Effect of gargling with tea and ingredients of tea on the prevention of influenza infection: A meta-analysis. *BMC Public Health* [Internet]. BMC Public

- 229 Health; **2016**; 16(1):1–7. Available from: <http://dx.doi.org/10.1186/s12889-016-3083-0>
- 230 10. E DIN EN 14476: 2011-12 Chemische Desinfektionsmittel und Antiseptika – Quantitativer  
231 Suspensionsversuch Viruzidie für in der Humanmedizin verwendete Desinfektionsmittel und  
232 Antiseptika – Prüfverfahren und Anforderungen (Phase 2/Stufe 1). Beuth-Verlag, Berlin Wien  
233 Zürich;
- 234 11. European Chemicals Agency. Guidance on the Biocidal Products Regulation: Volume II  
235 Efficacy - Assessment and Evaluation (Parts B + C). 2018.
- 236 12. Hensel A, Bauer R, Heinrich M, et al. Challenges at the Time of COVID-19: Opportunities and  
237 Innovations in Antivirals from Nature. *Planta Med.* **2020**; 86(10):659–664.
- 238 13. Mhatre S, Srivastava T, Naik S, Patravale V. Antiviral activity of green tea and black tea  
239 polyphenols in prophylaxis and treatment of COVID-19: A review. *Phytomedicine* [Internet].  
240 Elsevier; **2020**; (May):153286. Available from: <https://doi.org/10.1016/j.phymed.2020.153286>
- 241 14. Sundararajan A, Ganapathy R, Huan L, et al. Influenza virus variation in susceptibility to  
242 inactivation by pomegranate polyphenols is determined by envelope glycoproteins. *Antiviral*  
243 *Res* [Internet]. Elsevier B.V.; **2010**; 88(1):1–9. Available from:  
244 <http://dx.doi.org/10.1016/j.antiviral.2010.06.014>
- 245 15. Xu J, Xu Z, Zheng W. A review of the antiviral role of green tea catechins. *Molecules.* **2017**;  
246 22(8):1–18.
- 247
